# Supplementary material for: Nonlinear optical effects related to saturable and reverse saturable absorption by subphthalocyanines at 532 nm
Source: Royal Society of Chemistry journal article supplement (doi:10.1039/b502359a), 2005-01-01
Supplement: b502359a.pdf [file b502359a.pdf]

## Experimental

*Hexa-(p-tert-butylphenyl)subphthalocyaninato boron chloride*: 1 g (2.55 mmol) of bis-4,5-(*p*-*tert*-butylphenyl)phthalonitrile [16b] and 6 ml of 1M solution of BCl<sub>3</sub> in *p*-xylene were mixed together under argon atmosphere. The mixture was continuously stirred and gradually brought into strong reflux for about 1 hour. After further addition of 3-4 ml of BCl<sub>3</sub> solution, reflux was kept for another hour, the flask was flushed with a strong argon stream, and the solvent was removed under vacuum. The residue was dissolved in dichloromethane for the successive separation by column chromatography on silica-gel. The first purple fraction was taken, the eluent was evaporated and about 50 - 100 ml methanol were added to the dried fraction. The precipitate was filtered off and washed with a small portion of methanol. 1.2 g of violet powder resulted after drying in vacuo. Reaction was run approximately for 5 hours. Yield 0.32 g (31 %). EA percentages calculated for C<sub>84</sub>H<sub>84</sub>N<sub>6</sub>BCl (%): C (82.44), H (6.92), N (6.87); found: C (82.37), H (7.02), N (6.21). <sup>1</sup>H-NMR (in CDCl<sub>3</sub>), δ, ppm: 8.90 (s, 6H, *α*-H), 7.22-7.31 (m {dd}, 24H, *aryl*-H 6,7). <sup>13</sup>C-NMR (in CDCl<sub>3</sub>), δ, ppm: 31.3 (s, 10), 34.5 (s, 9), 124.2 (s, 3), 124.9 (s, 7), 129.8 (s, 6), 129.9 (s, 2), 138.2 (s, 5), 143.4 (s, 4), 150.1 (s, 8), 150.2 (s, 1). MALDI-TOF: m/z = 1179 (MH<sup>+</sup> - B - Cl), 1189 (MH<sup>+</sup> - Cl), 1224 (MH<sup>+</sup>, 100%), 1398 (MH<sup>+</sup> + matrix) and other peaks of low intensity. UV-Vis [ $\lambda_{\max}$  (nm) /relative intensity in chloroform]: 589 /1.00; 544(shoulder)/0.334; 355/0.388; 289 /0.919.

*Subphthalocyaninato boron chlorides 2*: 10 ml of 1M BCl<sub>3</sub> in *p*-xylene were slowly syringed into a flask containing 2.5 g (6 mmol) of 4,5-bis-(*m*-trifluoromethylphenyl)phthalonitrile (**1**) [16b]. Addition of BCl<sub>3</sub> was carried out under argon atmosphere. The mixture was continuously stirred and gradually brought into strong reflux for about 1 hour. After further addition of 3-4 ml of BCl<sub>3</sub> solution, reflux was kept for another hour, the flask was flushed with a strong argon stream, and the solvent was removed under vacuum. The residue was dissolved in dichloromethane for the successive separation by column chromatography on silica-gel. The first purple fraction was taken, the eluent was evaporated and about 50 - 100 ml methanol were added to the dried fraction. The precipitate was filtered off and washed with a small portion of methanol. 1.2 g of violet powder resulted after drying in vacuo. Yield: 45% (calculated for the average formula C<sub>66</sub>H<sub>30</sub>N<sub>6</sub>BCl<sub>3</sub>F<sub>16</sub>). EA percentages calculated for C<sub>66</sub>H<sub>30</sub>N<sub>6</sub>BCl<sub>3</sub>F<sub>16</sub> (%): C (59.69), H (2.28), N (6.33); found: C (59.64), H (2.18), N (6.25). <sup>1</sup>H-NMR (in CDCl<sub>3</sub>), δ, ppm: 8.86 (s, 6H, *α*-H), 7.37-7.83 (m, 24H, *aryl*-H 6,8,9,10). <sup>13</sup>C-NMR (in CDCl<sub>3</sub>), δ, ppm: 123.7 (q, <sup>1</sup>J ≈ 272 Hz, 11), 124.3 (s, 8+3), 126.9 (q, pure resolved, 6), 129.0 (s, 9), 130.3 (s, 2), 130.8 (q, <sup>2</sup>J ≈ 32.8 Hz, 7), 133.3 (s, 10), 140.8 (s, 5), 141.8 (s, 4), 150.0 (s, 1). MALDI-TOF: m/z = 1262 (MH<sup>+</sup> - Cl), 1277 (MH<sup>+</sup> - F), 1295 (MH<sup>+</sup>, 100%), 1311 (MH<sup>+</sup> - F + Cl), 1326 (MH<sup>+</sup> - 2F + 2Cl), 1344 (MH<sup>+</sup> - 3F + 3Cl) and other peaks of lower intensity. UV-Vis [ $\lambda_{\max}$  (nm) /relative intensity in toluene]: 584.7 /1.00; 564 (shoulder) /0.50; 538/0.38; 350/0.30; 327 /0.30; 281/0.52. The partial exchange of F atoms in the CF<sub>3</sub> groups of phthalonitrile **1** with Cl atoms from BCl<sub>3</sub> during the preparation of **2** could be verified by MALDI-TOF spectrometry and EA. In fact, the formula of **2** resulted to be C<sub>66</sub>H<sub>30</sub>N<sub>6</sub>BCl<sub>3</sub>F<sub>16</sub>, which correspond to SubPcs with Cl atoms replacing two F atoms per molecule on the average. The presence of CF<sub>2</sub>Cl groups in mixture **2** could be furtherly verified from <sup>13</sup>C-NMR spectra of **2** because the aromatic C linked to the CF<sub>3</sub> group appears as an intense quadruplet at 130.8 ppm with a splitting constant of <sup>2</sup>J ≈ 32.8 Hz, whereas the aromatic C linked to CF<sub>2</sub>Cl group appears as a triplet at 136.5 ppm with a splitting constant <sup>2</sup>J ≈ 26.6 Hz.

### *NLO measurements*

Nonlinear transmission measurements were carried out with 9 ns pulses of a Nd:YAG laser (Quantel YG980E) at its duplicated frequency (532 nm) at 2 Hz. Measurements of the incident and transmitted energies were recorded pulse by pulse with a pyroelectric detector (Scientech SPHD25) and a calibrated photodiode.

A half-wave plate and a cube polarizer were used for controlling the pulse energies. Glass cuvettes with 2 mm optical path length were used for the solutions in toluene. The laser beam diameter on the sample was in the order of 2.5 mm. Associated linear optical spectra were recorded with a UV-vis-NIR spectrometer (Varian Cary 5) before and after the NLO transmission measurements.

### *Rate equations for the five level model*

Absorption cross sections  $\sigma_i$ , rate constants  $k_i$  and the populations  $N_i$  refer to the model reported in the inset of Figure 3.

$$\frac{dN_{S0}}{dt} = -\sigma_S(N_{S0} - N_{S1})I + k_S N_{S1} + k_{TS} N_{T1}$$

$$\frac{dN_{S1}}{dt} = -\sigma_S(N_{S1} - N_{S0})I - k_S N_{S1} - k_{ST} N_{S1}$$

$$\frac{dN_{T1}}{dt} = -\sigma_{T1}(N_{T1} - N_{T2})I + k_{ST} N_{S1} + k_{T1} N_{T2} - k_{TS} N_{T1}$$

$$\frac{dN_{T2}}{dt} = -\sigma_{T2}(N_{T2} - N_{T3})I - k_{T1} N_{T2} - \sigma_{T1}(N_{T2} - N_{T1})I + k_{T2} N_{T3}$$

$$\frac{dN_{T3}}{dt} = -\sigma_{T2}(N_{T3} - N_{T2})I - k_{T2} N_{T3}$$
